# Supplementary material
Source: Springer Nature journal article supplement (https://www.springermedizin.de/resource/supplementary/12879_2012_2020_MOESM2_ESM.pdf/9443508)
Supplement: MOESM2 [file 9443508]

10 20 30 40 50 60  
HHV-8 NC\_003409 CAGTGCTACCCCAATTTTTAGCCGAAGGATTCCACCATTGTGCTCGAATCCAACGGAT  
HHV8 ORF26 C-1 .G.-.AATT.----GA.....  
HHV-8 ORF26 C-2 .G.-.AATT.----GA.....A.....  
HHV-8 ORF26 C-3 .G.-.AATT.----GA.....  
HHV-8 ORF26 C-4 .G.-.AATT.----GA.....  
HHV-8 ORF26 C-5 .C.C.AATT.A.T.G.GA.....  
HHV8\_26\_01.1 -----  
HHV8\_26\_02.1 -----  
HHV8\_26\_Pb1.1 -----

70 80 90 100 110 120  
HHV-8 NC\_003409 TTGACCTCGTGTCCCATGGTCGTGCCGAGCAACTGGGGCAGCCTATTCTGCAGCAGC  
HHV8 ORF26 C-1 .....T  
HHV-8 ORF26 C-2 .....T  
HHV-8 ORF26 C-3 .....T  
HHV-8 ORF26 C-4 .....T  
HHV-8 ORF26 C-5 .....G.....T  
HHV8\_26\_01.1 -----  
HHV8\_26\_02.1 -----  
HHV8\_26\_Pb1.1 -----

130 140 150 160 170 180  
HHV-8 NC\_003409 TGTGGTGTACCACATCTACTCCAAAATATCGGCCGGGGCCCCGGATGATGTAAATATGG  
HHV8 ORF26 C-1 .....C.....  
HHV-8 ORF26 C-2 .....C.....  
HHV-8 ORF26 C-3 .....A.....C.....  
HHV-8 ORF26 C-4 .....C.....  
HHV-8 ORF26 C-5 .....C.....  
HHV8\_26\_01.1 -----  
HHV8\_26\_02.1 -----  
HHV8\_26\_Pb1.1 -----

190 200 210 220 230 240  
HHV-8 NC\_003409 CGGAACCTTGATCTATATACCACCAATGTGTCATTTATGGGGCGCACATATCGTCTGGACG  
HHV8 ORF26 C-1 .....  
HHV-8 ORF26 C-2 .....  
HHV-8 ORF26 C-3 .....A.....  
HHV-8 ORF26 C-4 .....T.G.....  
HHV-8 ORF26 C-5 .....  
HHV8\_26\_01.1 -----  
HHV8\_26\_02.1 -----  
HHV8\_26\_Pb1.1 -----

250 260 270  
HHV-8 NC\_003409 TAGACAACACGGATCCACGCTACTGCCCTGCG  
HHV8 ORF26 C-1 .....AATCAC..G..AAT.CGC  
HHV-8 ORF26 C-2 .....AATCAC..G..AAT.CGC  
HHV-8 ORF26 C-3 .....AATCAC..G..AAT.CGC  
HHV-8 ORF26 C-4 .....AATCAC..G..AAT.CGC  
HHV-8 ORF26 C-5 .....AATC---GAATT.CCGC  
HHV8\_26\_01.1 -----  
HHV8\_26\_02.1 -----  
HHV8\_26\_Pb1.1 -----
